# Supplementary material for: Proteasomal degradation of BRAHMA promotes Boron tolerance in Arabidopsis
Source: PubMed Central journal article supplement (PMC6290004; doi:10.1038/s41467-018-07393-6), 2018-12-11
Supplement: 41467_2018_7393_MOESM1_ESM.pdf [file 41467_2018_7393_MOESM1_ESM.pdf]

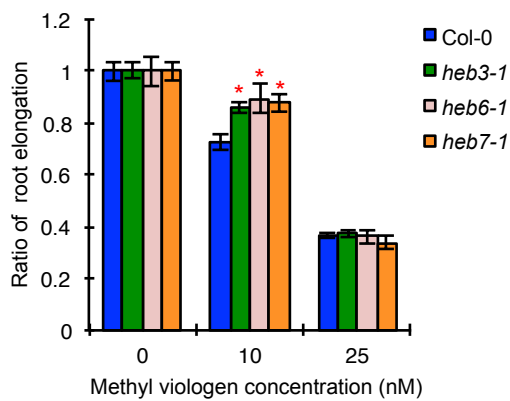

**Supplementary Figure 1: Sensitivity of root growth of Col-0 and the *heb* mutants to oxidative stress**

Oxidative stress was caused by methyl viologen. After 5 d incubation on normal media, plants were transferred to media containing indicated concentrations of methyl viologen. Then the elongated primary root length during additional 4 d incubation was measured. Values were represented as ratio relative to the value under 0 nM condition (n=13–16, average  $\pm$  s.e.m; \* $P$ <0.05, compared with Col-0, Student's *t*-test).

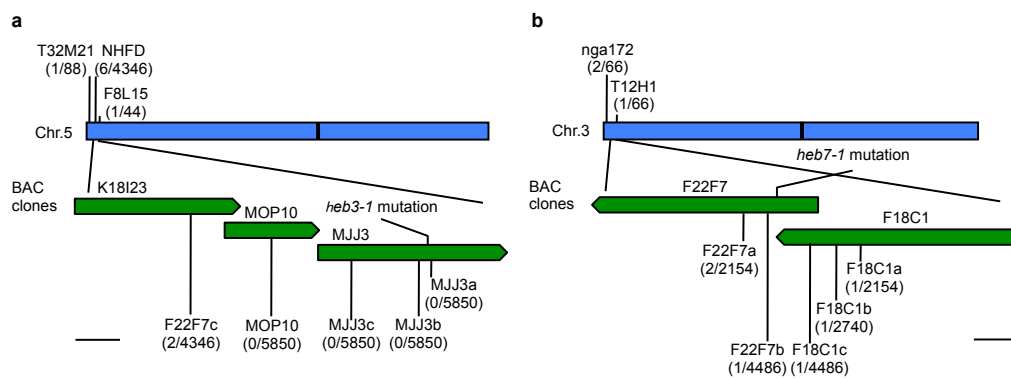

## Supplementary Figure 2: Mapping of *heb3-1* and *heb7-1* mutations

(a,b) Map position of the *heb3-1* (a) and *heb7-1* (b) mutations. The markers used and the number of chromosomes at each marker position over the number of total chromosomes analyzed is shown. Scale bars, 20 kb.

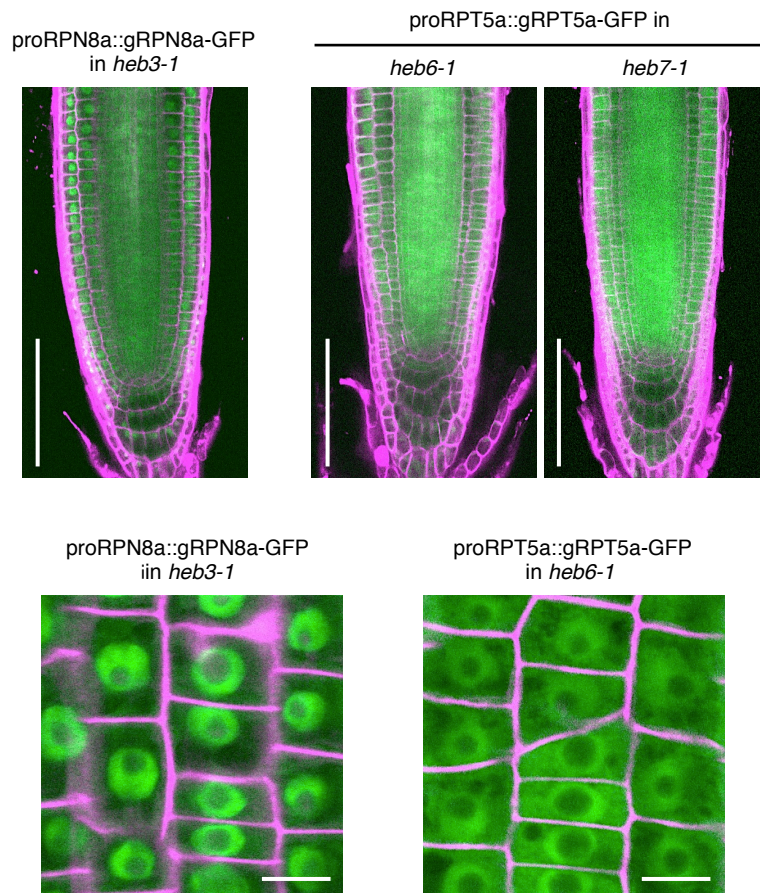

**Supplementary Figure 3: GFP fused RPN8a and RPT5a expressions in RAM**

Expression patterns of GFP fused RPN8a and RPT5a in RAM of transgenic plants used in Fig. 2c and 2d. Nine day-old seedlings grown on normal media were observed by confocal microscopy. Magnified images (lower panels) show subcellular localizations of each protein. Scale bars, 50  $\mu\text{m}$  (upper) and 5  $\mu\text{m}$  (lower).

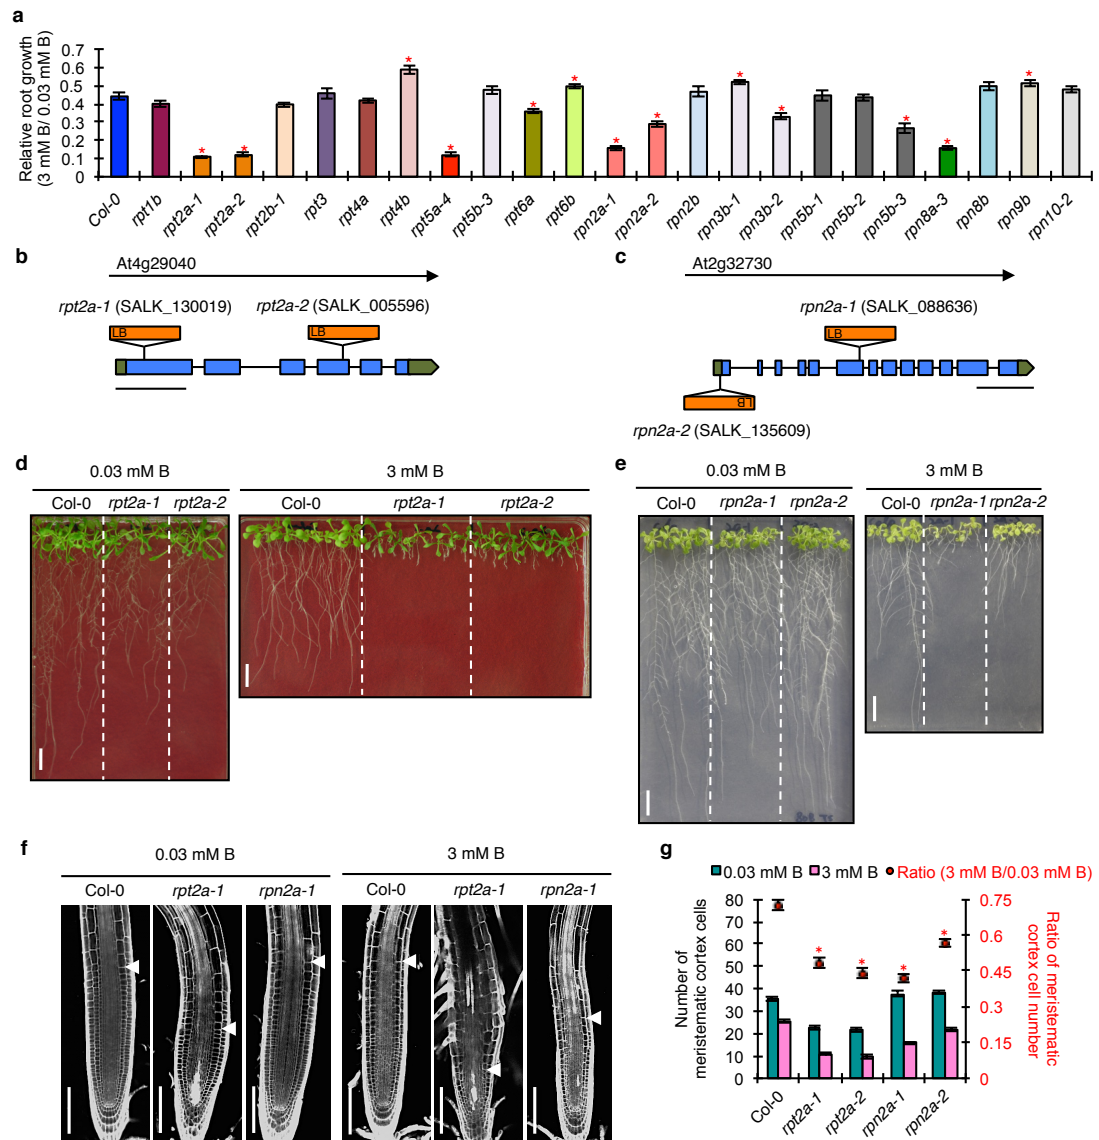

#### Supplementary Figure 4: RPT2a and RPN2a are also required for the tolerance to high-B stress in RAM

(a) Sensitivity of root growth of Col-0 and various mutants of RPs. Plants were grown on 0.03 and 3 mM B condition for 10 d. Then the primary root length was measured. Values were represented as ratio relative to the value under 0.03 mM B condition (n=10–20, average  $\pm$  s.e.m; \* $P$ <0.05, compared with Col-0, Student's  $t$ -test). (b,c) Gene structure and T-DNA insertion sites in *RPT2a* (b) and *RPN2a* (c). Blue and green boxes indicate coding regions and untranslated

regions, respectively. **(d,e)** Short-root phenotypes of T-DNA inserted mutants of *RPT2a* **(d)** and *RPN2a* **(e)** grown under normal- (left) and high-B (right) conditions for 14 d. Scale bars, 1 cm. **(f)** Representative images of root morphology of the *rpt2a* and the *rpn2a* mutants under normal- and high-B conditions. Arrowheads indicate the border between meristem and elongating region. Scale bars, 50  $\mu$ m. **(g)** Effect of high-B stress on the number of cortex cells in the RAM of Col-0, the *rpt2a*, and the *rpn2a* mutants. Red circles represent the ratio relative to the value under 0.03 mM B condition (n=10–16, average  $\pm$  s.e.m; \* $P$ <0.05, compared with Col-0, Student's *t*-test).

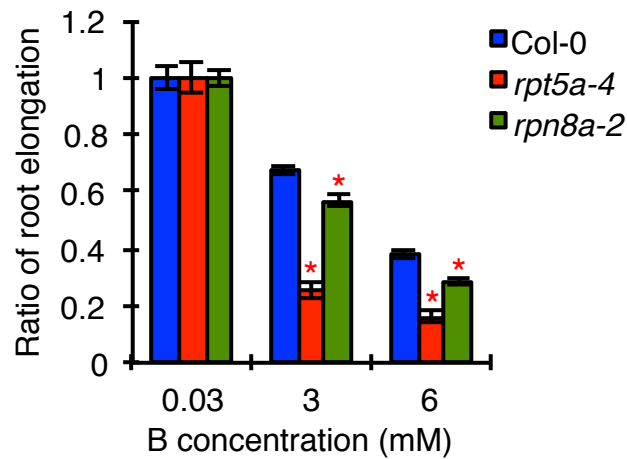

**Supplementary Figure 5: RPT5a and PRN8a are required for post-embryonic tolerance to high-B stress**

Sensitivity of root growth in Col-0, *rpt5a-4* and *rpn8a-2* to high-B stress by the transplant method. Values are represented as ratios relative to the values at 0.03 mM B (n=14–16, average  $\pm$  s.e.m; \* $P$ <0.05, compared with the wild type, Student's *t*-test).

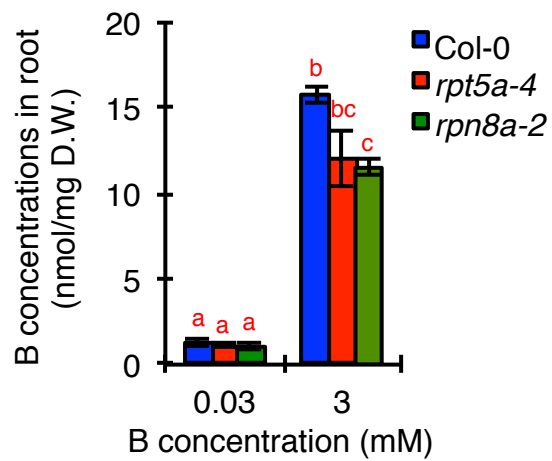

**Supplementary Figure 6: Hypersensitivity of the RP subunit mutants is not caused by over accumulation of B**

Boron concentrations in roots of Col-0, *rpt5a-4* and *rpn8a-2* grown under normal- and high-B conditions (n=4, average  $\pm$  s.e.m;  $P < 0.05$ , one-way ANOVA and Tukey HSD).

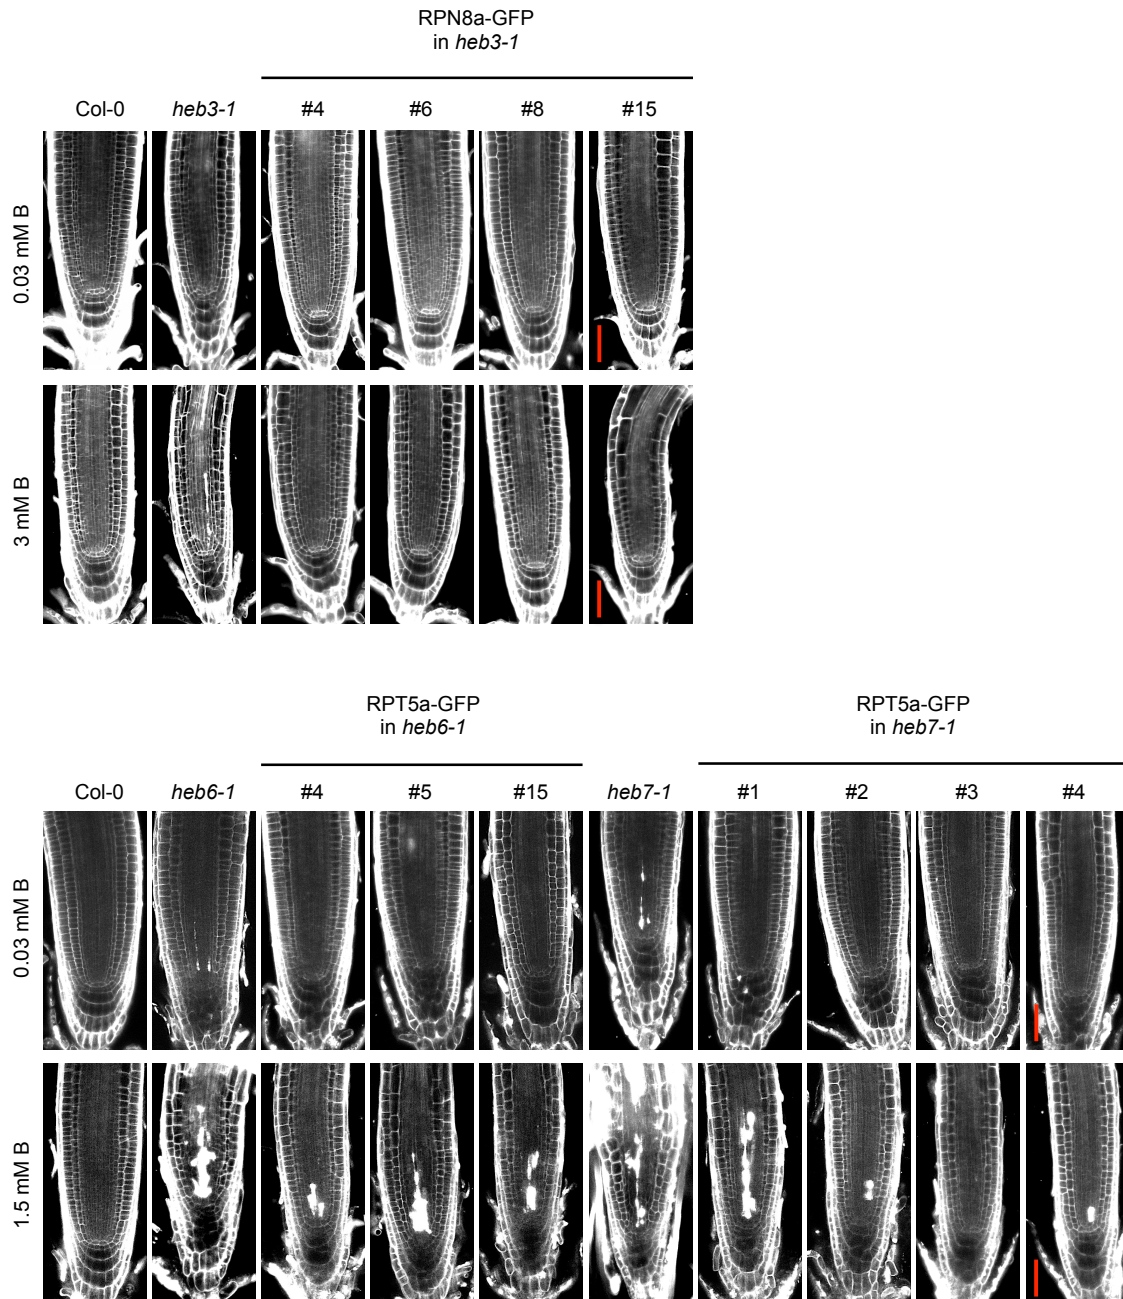

**Supplementary Figure 7: RAM morphology of RPN8a-GFP expressing *heb3-1* and RPT5a-GFP expressing *heb6-1* and *heb7-1***

Representative images of root morphology of Col-0, *heb3-1*, *heb6-1*, *heb7-1*, RPN8a-GFP expressing *heb3-1*, and RPT5a-GFP expressing *heb6-1* and *heb7-1* transgenic plants grown under normal- and high-B conditions.



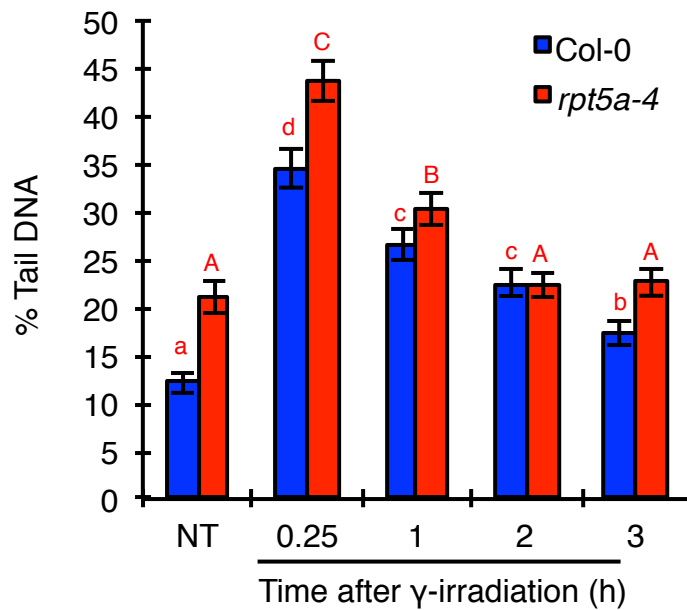

**Supplementary Figure 8: Analysis of DSB repair in root tips of *rpt5a***

Time course of DSB levels in root tips of Col-0 and *rpt5a-4* after transient DSB induction by  $\gamma$ -irradiation (n=121, average  $\pm$  s.e.m;  $P < 0.05$ , one-way ANOVA and Tukey HSD). This data was used for the calculation of DSB repair kinetics shown in Fig. 4d.

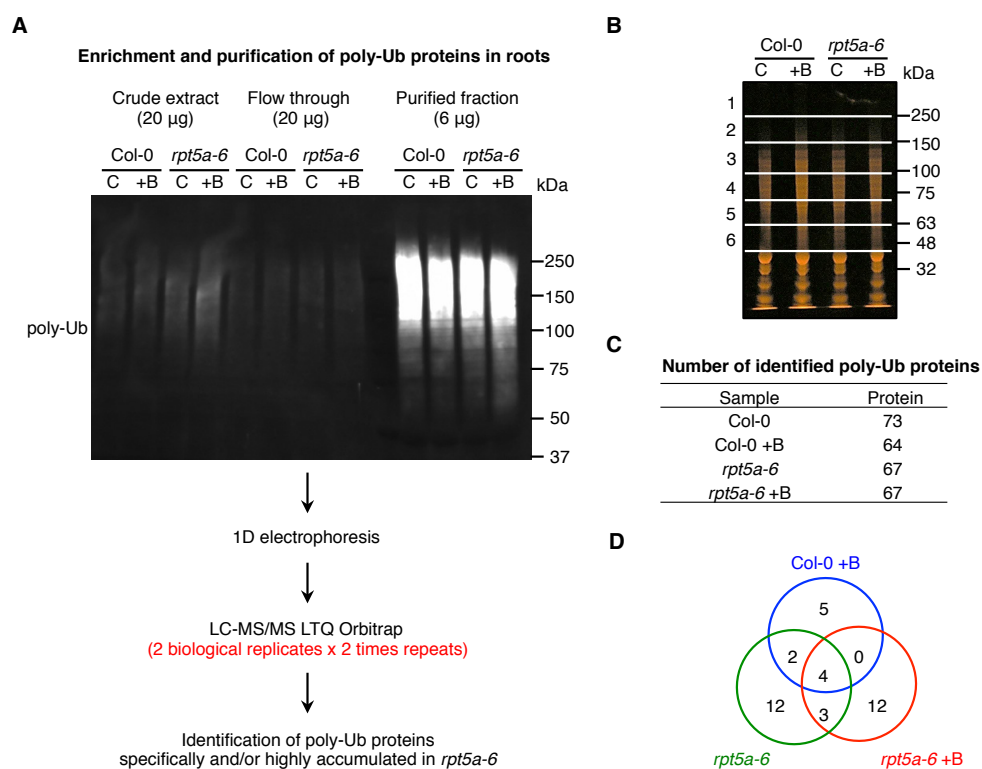

## Supplemental Figure 9: Identification of poly-Ub proteins responsible for the hypersensitivity of the *rpt5a* mutants to high-B stress

(a) Schematic representation of identification of accumulated poly-Ub proteins in roots. Immunoblot analysis indicates enrichment of poly-Ub proteins in roots. (b) Proteins separated onto SDS-PAGE gel were divided into six fractions. Extracted proteins from each fraction were subjected to LC-MS/MS analysis. (c) Number of identified poly-Ub proteins in each sample. Among four independent analyses, only proteins detected at least two times were used. The details of the proteins were listed in Supplementary Data 1. (d) Comparison of identified poly-Ub proteins which accumulate depending on high-B stress, loss of RPT5A function, and both factors. Twelve proteins specifically accumulated in high-B treated *rpt5a-6* are listed in Supplementary Table 1.

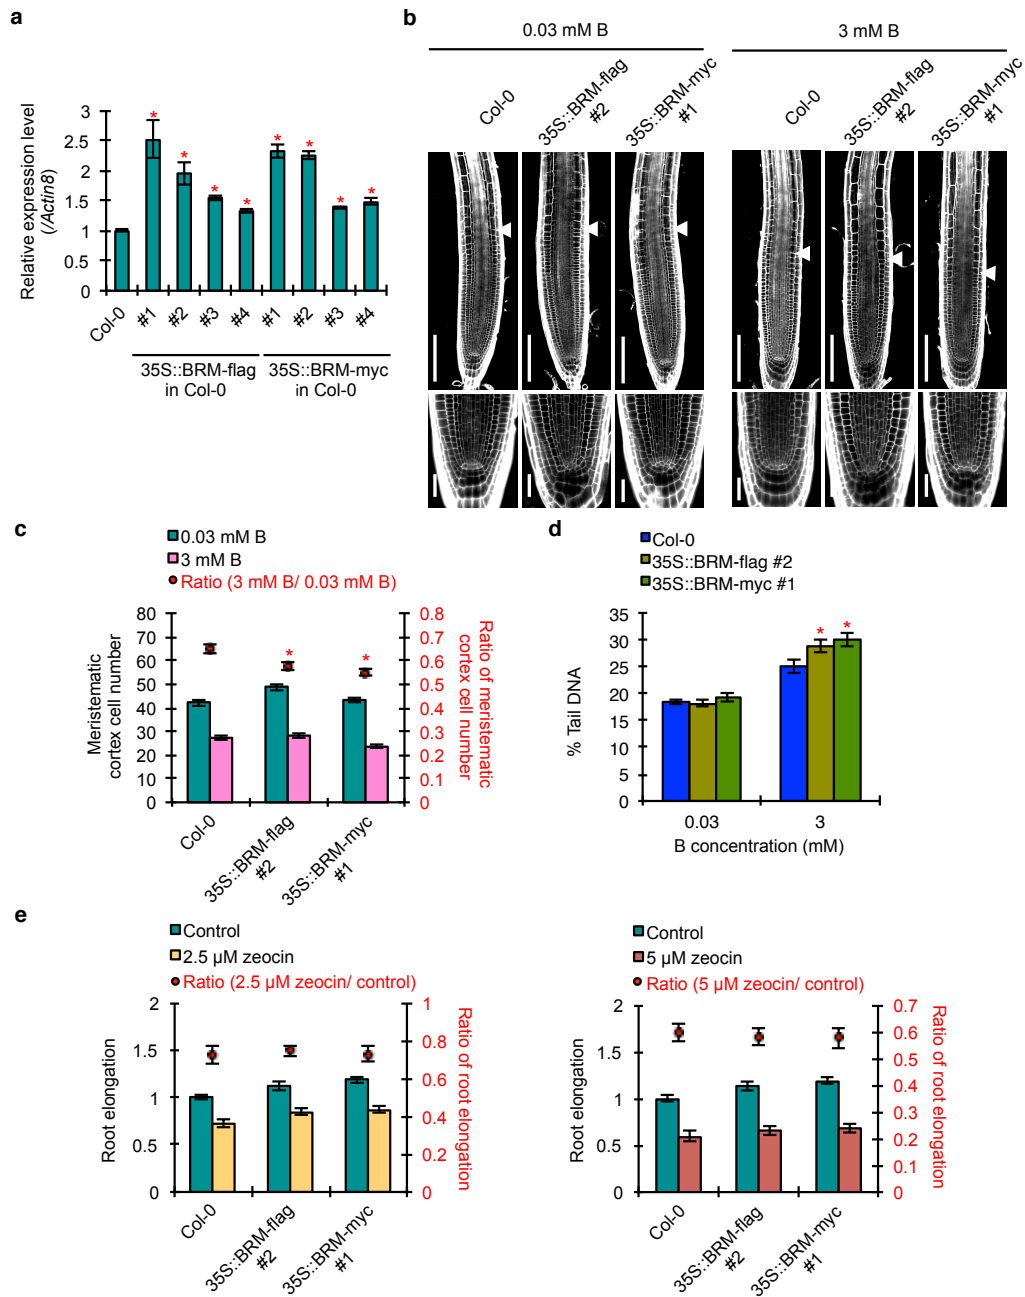

### Supplementary Figure 10: Analysis of transgenic plants showing enhanced expression of BRM

(a) Expression levels of *BRM* mRNA in the roots of 7 d-old transgenic plants (n=4, average  $\pm$  s.e.m; \* $P$ <0.05, compared with Col-0, Student's *t*-test).

**(b)** Representative images of root morphology of two transgenic plants treated with normal- and high-B for 4 d. Arrowheads indicate the border between the meristem and elongating region. Below is the magnified image of stem cell niche. Scale bars, 50  $\mu\text{m}$ .

**(c)** Effect of high-B stress on the number of cortex cells in the RAM of Col-0 and two transgenic plants. Red circles represent the ratio relative to the value under 0.03 mM B condition (n=19–20, average  $\pm$  s.e.m; \* $P$ <0.05, compared with Col-0, Student's  $t$ -test).

**(d)** Levels of DSBs in root tips of two transgenic plants treated with normal- and high-B for 4 d (n=125 nuclei, average  $\pm$  s.e.m; \* $P$ <0.05, compared with Col-0, Student's  $t$ -test).

**(e)** Sensitivity of root growth of two transgenic plants to DSBs-inducing factor, zeocin. Values for root elongation are represented as the ratio relative to the value of Col-0 under 0  $\mu\text{M}$  zeocin condition. Red circles represent the ratio relative to the value under 0  $\mu\text{M}$  zeocin condition (n=26, average  $\pm$  s.e.m; \* $P$ <0.05, compared with Col-0, Student's  $t$ -test).

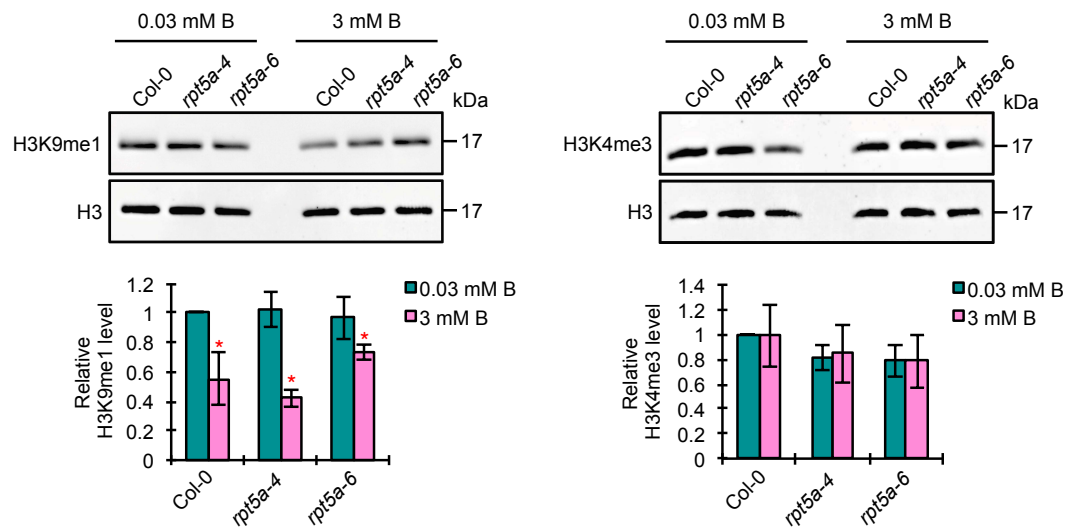

### Supplementary Figure 11: Effects of high-B stress on histone modifications H3K9me1 and H3K4me3

Levels of histone H3 acetylation in roots of Col-0 and *the rpt5a* mutants grown under normal- and high-B conditions. Lower panel shows the relative level of indicated histone H3 modification normalized against total histone H3 (n=3, average  $\pm$  s.e.m; \* $P < 0.05$ , compared with Col-0 under 0.03 mM B condition, Student's *t*-test).

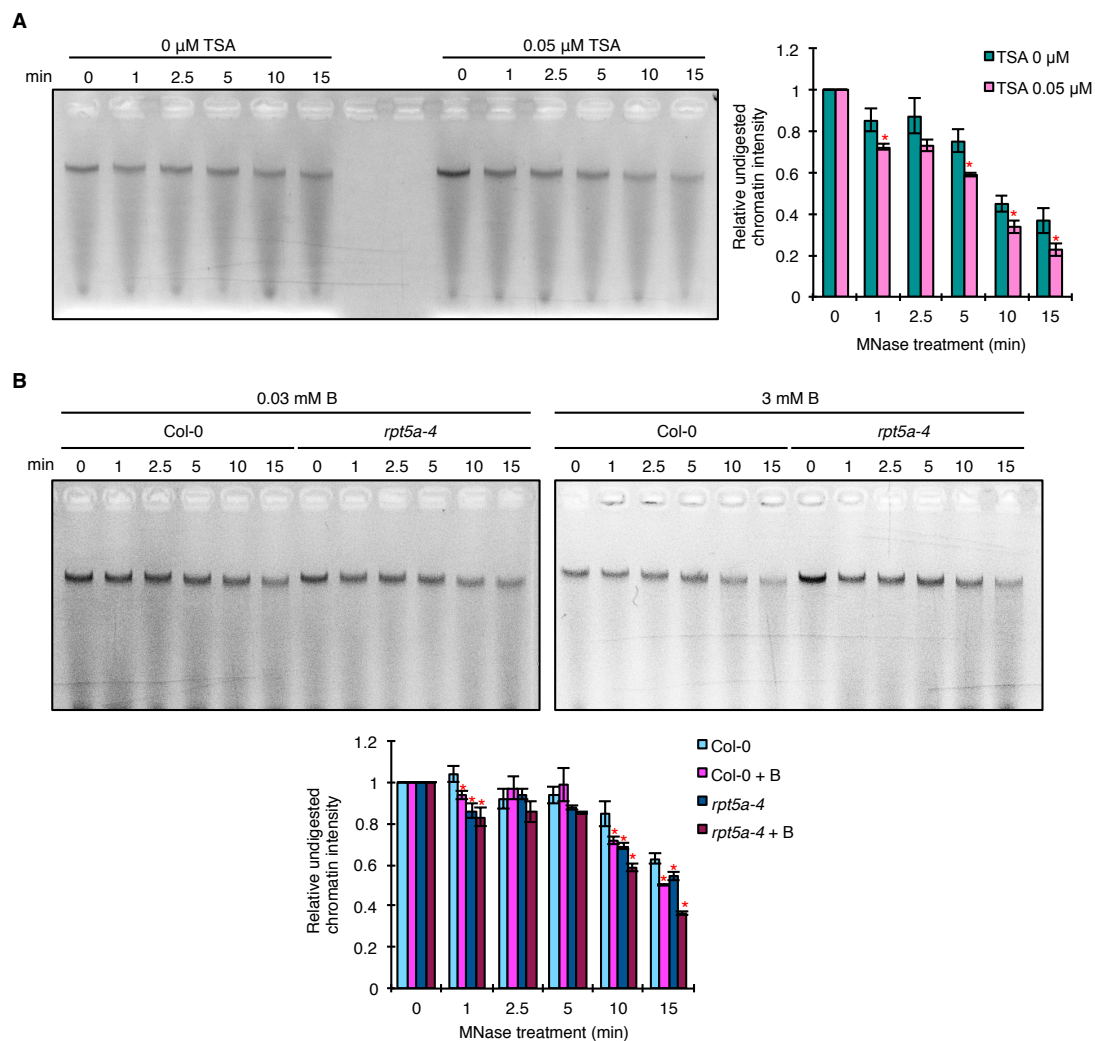

### Supplementary Figure 12: High-B stress and TSA treatment reduces chromatin integrity

**(a,b)** Chromatin integrity was analyzed by MNase assay. After 5 d incubation on normal media, plants were transferred to media containing indicated concentration of TSA **(a)** or B **(b)**. Representative images of MNase assay were shown. Values were represented as ratio of undigested chromatin intensity relative to that under 0 min MNase treatment. Average  $\pm$  s.e.m. ( $n=3$ ) were shown. Asterisks indicate significant differences between Col-0 under the normal condition and treatment or mutation ( $P < 0.05$ , Student's  $t$ -test).

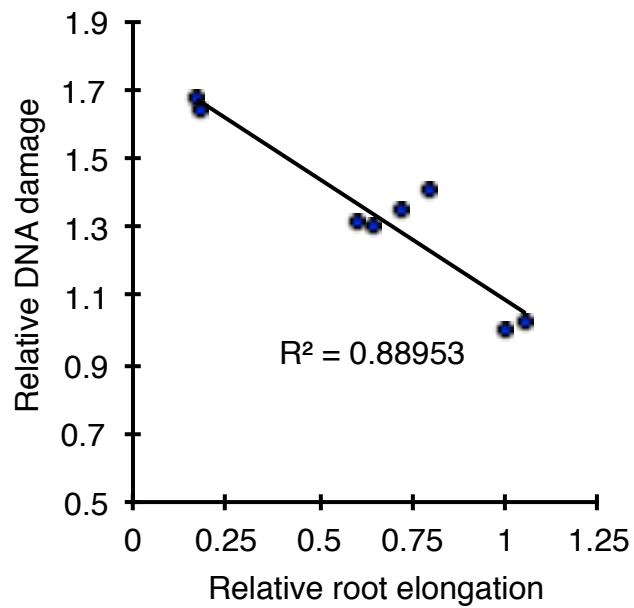

**Supplementary Figure 13: DSBs in RAM is a major cause of root growth inhibition caused by high-B stress**

Relationship between root growth and DSB levels in root tips under high-B conditions using data from Fig. 4b and Supplementary Fig. 5. A correlation between the extent of DSB levels and the extent of root growth inhibition was observed.

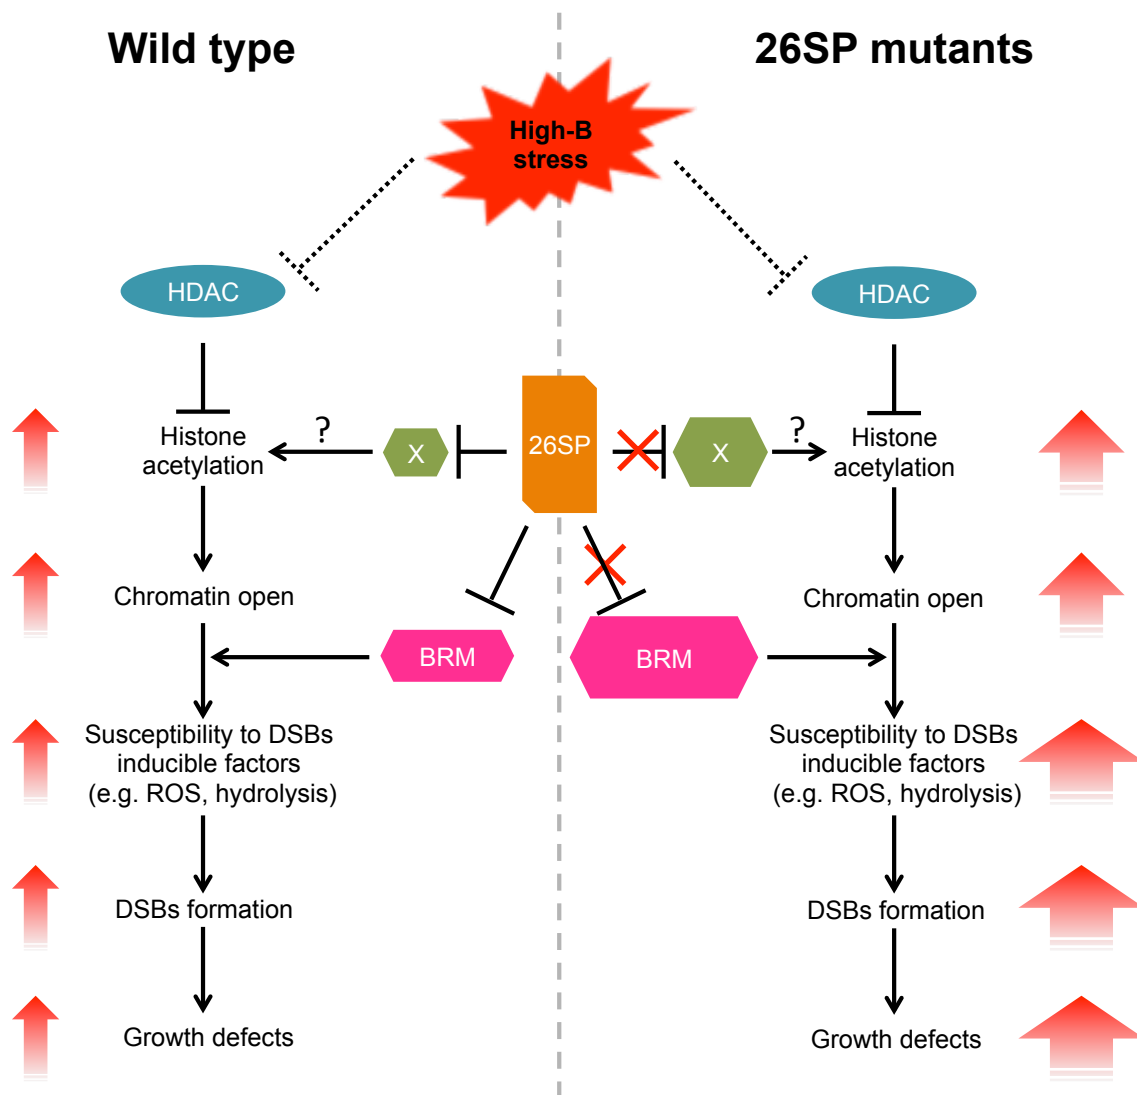

**Supplementary Figure 14: A schematic model for the inhibitory mechanism of DSBs caused by high-B stress in *Arabidopsis***

High-B stress destabilizes chromatin *via* increased histone acetylation. 26SP degrades BRM, which preventing overfunction of BRM on further chromatin destabilization and subsequent increased susceptibility to DNBs inducible factors. It is noted that the inhibitory effect of high-B stress on HDAC activities in *Arabidopsis* was not confirmed in this study.



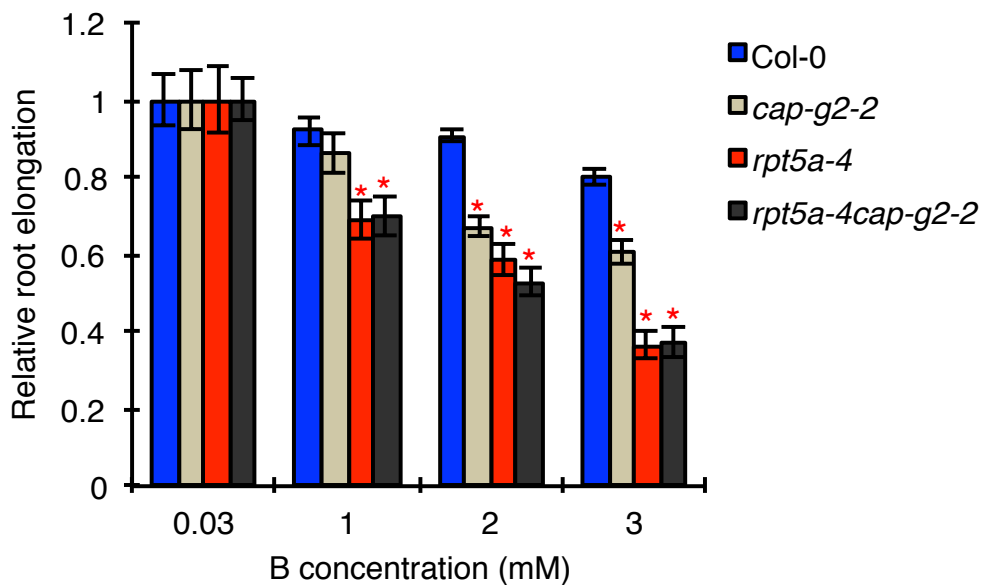

**Supplementary Figure 15: 26SP and condensin II acts in the tolerance to high-B stress in a coordinated manner**

Sensitivity of root growth of Col-0 and *rpt5a-4cap-g2-2* to high-B stress. After 5 d incubation on normal media, plants were transferred to media containing indicated concentrations of B. Then the elongated primary root length during additional 4 d incubation was measured. Values were represented as ratio relative to the value under 0.03 mM B condition. Average  $\pm$  s.e.m. (n=14–19) were shown. Asterisks indicate significant differences between Col-0 and each mutant ( $P < 0.05$ , Student's *t*-test). There are no significant differences between *rpt5a-4* and *rpt5a-4cap-g2-2* ( $P \geq 0.05$ , Student's *t*-test).

Figure 5a

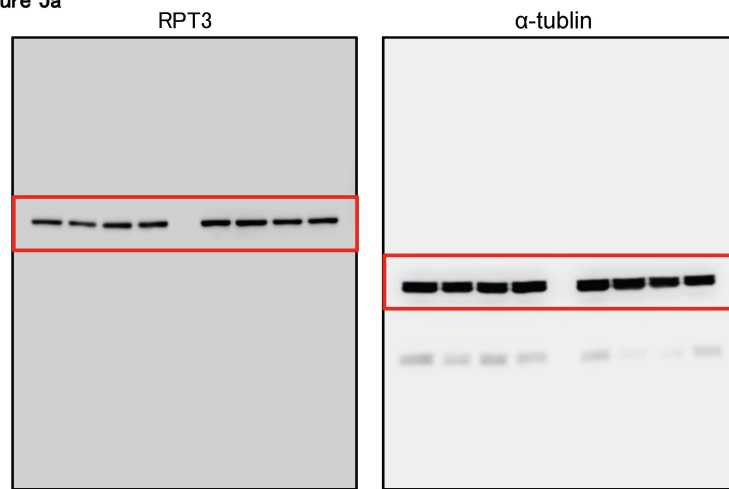

Figure 6b

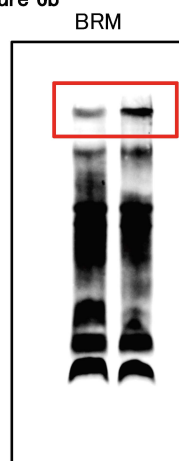

Figure 6c

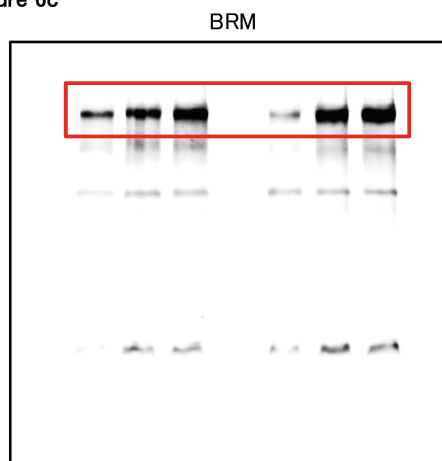

$\alpha$ -tubulin

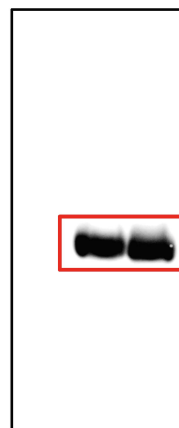

$\alpha$ -tubulin

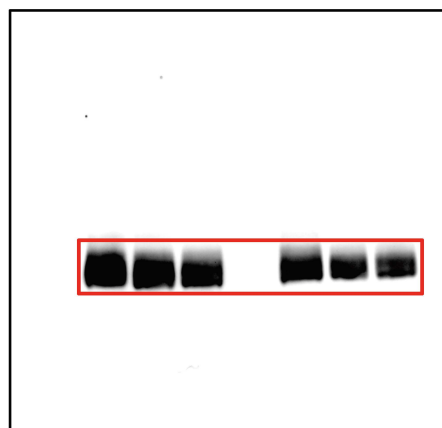

### Supplementary Figure 16: Uncut blots

The red sections mark blot results shown in the indicated figures.

Figure 9a

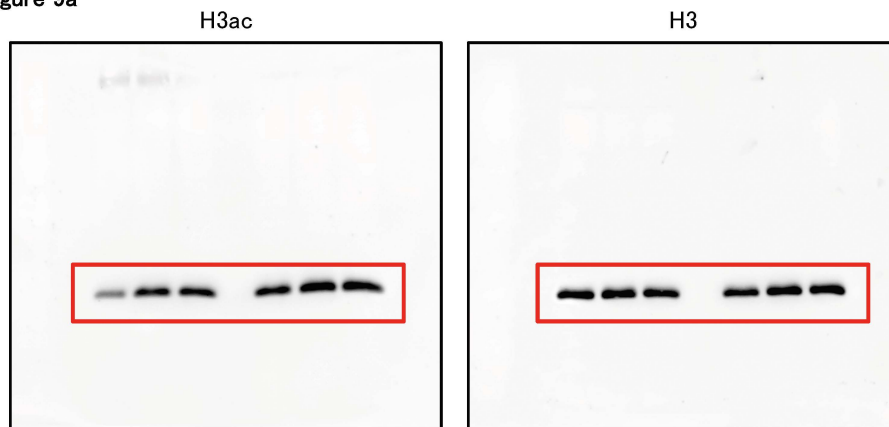

Figure 9g

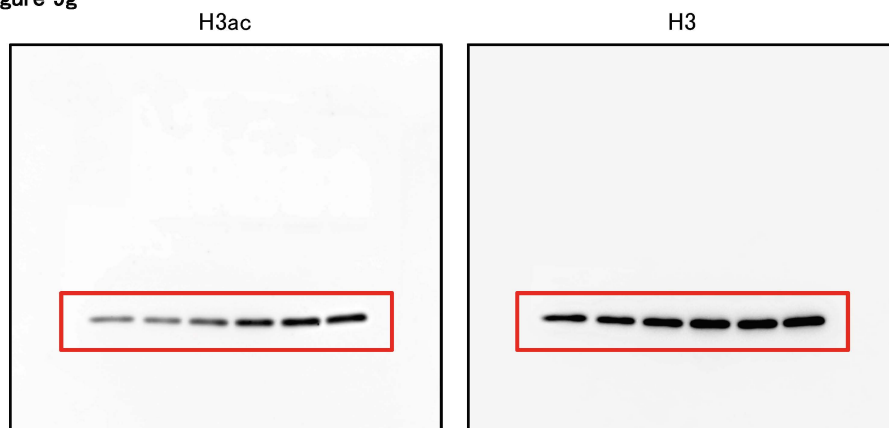

Figure 10e

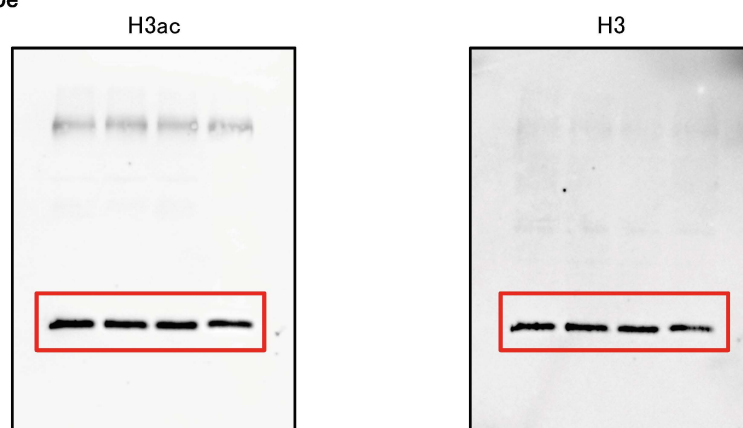

**Supplementary Figure 17: Uncut blots**

The red sections mark blot results shown in the indicated figures.

Supplementary Figure 11

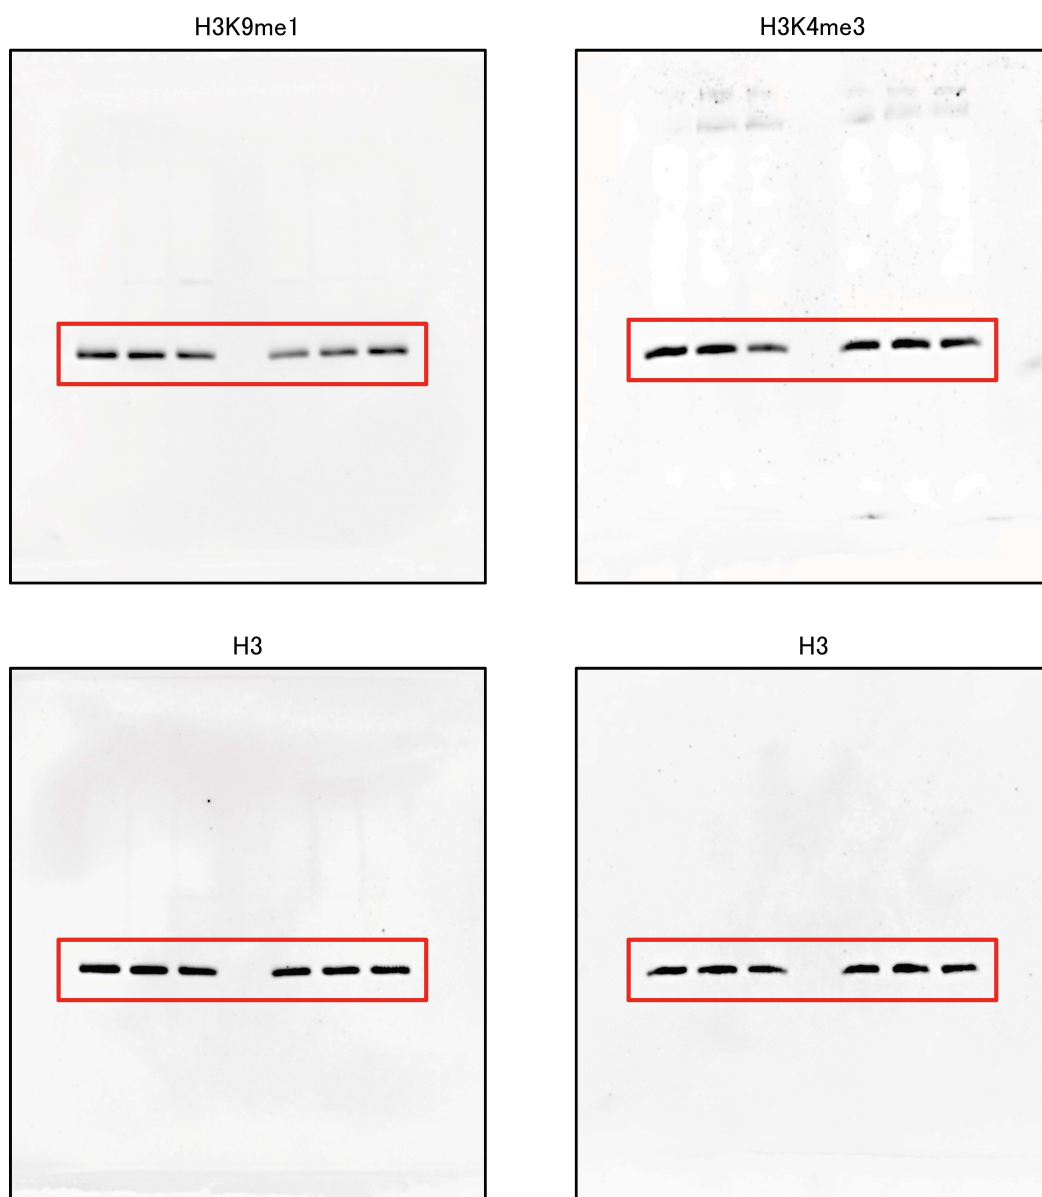

**Supplementary Figure 18: Uncut blots**

The red sections mark blot results shown in the indicated figures.

## Supplementary Tables

**Supplementary Table 1. Poly-Ub proteins specifically accumulated in *rpt5a-4* treated with high-**

| AGI code  | Annotation                                 | Number of motifs |         |       |
|-----------|--------------------------------------------|------------------|---------|-------|
|           |                                            | PEST             | KEN-box | D-box |
| AT1G04940 | TIC20 (Translocon at chloroplast membrane) | 0                | 0       | 1     |
| AT1G49340 | PI4K (Phosphatidylinositol 4-kinase alpha) | 2                | 0       | 9     |
| AT1G59890 | SNL5 (SIN3-like 5)                         | 2                | 3       | 1     |
| AT1G74430 | MYB95                                      | 1                | 0       | 0     |
| AT2G20805 | DNA-binding storekeeper protein-related    | 0                | 0       | 0     |
| AT2G46020 | BRM/CHR2 (Chromatin remodeling 2)          | 2                | 1       | 2     |
| AT3G06980 | DEAD/DEAH box helicase                     | 2                | 1       | 1     |
| AT3G07980 | MAPKKK6                                    | 3                | 1       | 3     |
| AT3G58530 | RNI-like superfamily                       | 0                | 0       | 1     |
| AT4G23950 | Galactose-binding protein                  | 0                | 1       | 0     |
| AT5G10170 | MIPS3 (Myo-inositol-3-phosphate synthase)  | 0                | 0       | 1     |
| AT5G27220 | Frigida-like protein                       | 1                | 0       | 2     |

See also Supplementary Fig. 4 and Data 1 for the screening strategy and the list of detected proteins, respectively.

**Supplementary Table 2.** List of T-DNA inserted mutants used in this study

| Gene          | AGI code  | Mutants                                                                                            |
|---------------|-----------|----------------------------------------------------------------------------------------------------|
| <i>RPT1a</i>  | At1g53750 |                                                                                                    |
| <i>RPT1b</i>  | At1g53780 | SALK_106176 ( <i>rpt1b</i> )                                                                       |
| <i>RPT2a</i>  | At4g29040 | SALK_130019 ( <i>rpt2a-1</i> )<br>SALK_005596 ( <i>rpt2a-2</i> )                                   |
| <i>RPT2b</i>  | At2g20140 | SALK_043450 ( <i>rpt2b-1</i> )                                                                     |
| <i>RPT3</i>   | At5g58290 | SALK019265 ( <i>rpt3</i> )                                                                         |
| <i>RPT4a</i>  | At5g43010 | SALK_052732 ( <i>rpt4a</i> )                                                                       |
| <i>RPT4b</i>  | At1g45000 | SALK_101982 ( <i>rpt4b</i> )                                                                       |
| <i>RPT5a</i>  | At3g05530 | SALK_046321 ( <i>rpn5a-4</i> )<br><i>heb6-1/rpt5a-5</i><br><i>heb6-2/rpt5a-6</i>                   |
| <i>RPT5b</i>  | At1g09100 | SAIL_293_H08 ( <i>rpt5b-3</i> )                                                                    |
| <i>RPT6a</i>  | At5g19990 | SAIL_443_F04 ( <i>rpt6a</i> )                                                                      |
| <i>RPT6b</i>  | At5g20000 | GABI_483G04 ( <i>rpt6b</i> )                                                                       |
| <i>RPN1a</i>  | At2g20580 |                                                                                                    |
| <i>RPN1b</i>  | At4g28470 |                                                                                                    |
| <i>RPN2a</i>  | At1g08140 | SALK_088636 ( <i>rpn2a-1</i> )<br>SALK_135609 ( <i>rpn2a-2</i> )                                   |
| <i>RPN2b</i>  | At2g32730 | SALK_024347 ( <i>rpn2b</i> )                                                                       |
| <i>RPN3a</i>  | At1g20200 |                                                                                                    |
| <i>RPN3b</i>  | At1g75990 | SALK_117415 ( <i>rpn3b-1</i> )<br>SALK_088176 ( <i>rpn3b-2</i> )                                   |
| <i>RPN5a</i>  | At5g09900 |                                                                                                    |
| <i>RPN5b</i>  | At5g64760 | SALK_134671 ( <i>rpn5b-1</i> )<br>SALK_133892 ( <i>rpn5b-2</i> )<br>SALK_127791 ( <i>rpn5b-3</i> ) |
| <i>RPN6</i>   | At1g29150 |                                                                                                    |
| <i>RPN7</i>   | At4g24820 |                                                                                                    |
| <i>RPN8a</i>  | At5g05780 | SALK_151595 ( <i>rpn8a-2</i> )<br><i>heb3-1/rpn8a-3</i>                                            |
| <i>RPN8b</i>  | At3g11270 | SALK_009871 ( <i>rpn8b</i> )                                                                       |
| <i>RPN9a</i>  | At5g45620 | SALK_043310 ( <i>rpn9b</i> )                                                                       |
| <i>RPN9b</i>  | At4g19006 |                                                                                                    |
| <i>RPN10</i>  | At4g38630 | SALK_009616 ( <i>rpn10-2</i> )                                                                     |
| <i>RPN11</i>  | At5g23540 |                                                                                                    |
| <i>RPN12a</i> | At1g64520 |                                                                                                    |
| <i>RPN12b</i> | At5g42040 |                                                                                                    |
| <i>BRM</i>    | At2g46020 | SALK_088462 ( <i>brm-3</i> )                                                                       |
| <i>HDA6</i>   | AT5g63110 | <i>axe1-4</i>                                                                                      |
| <i>HDA19</i>  | AT4g38130 | SALK_139445                                                                                        |

**Supplementary Table 3.** Primers used in this study

| Experiment                        | Primer Name                       | Primer sequence (5' to 3')   | Remarks     |
|-----------------------------------|-----------------------------------|------------------------------|-------------|
| T-DNA insertion                   | SALK (pROK2) LBb1                 | GATGGCCCACTACGTGAACCAT       |             |
|                                   | SALK (pROK2) LBa1                 | TGGTTCACGTAGTGGGCCATCG       |             |
|                                   | SALK (pROK2) LBb1.3               | ATTTTGCCGATTTCCGGAAC         |             |
|                                   | SALK_088636 ( <i>rpn2a-1</i> )_F  | TTCTCATTCTTTGTCAACCG         |             |
|                                   | SALK_088636 ( <i>rpn2a-1</i> )_R  | AGCATGCATAATGGCATTAGC        | with LBb1   |
|                                   | SALK_135609 ( <i>rpn2a-2</i> )_F  | AATCGTGTGTTGTTGTTTCATACAC    |             |
|                                   | SALK_135609 ( <i>rpn2a-2</i> )_R  | AGCTCAAACAATCCAAATCCC        | with LBb1   |
|                                   | SALK_024347 ( <i>rpn2b</i> )_F    | TGAAGGTTGTCCAGGTTTCAG        |             |
|                                   | SALK_024347 ( <i>rpn2b</i> )_R    | ACAAATTTTCCGCATCATGAC        | with LBb1   |
|                                   | SALK_117415 ( <i>rpn3b-1</i> )_F  | CTGCAAAAACATTGAAAAGGG        |             |
|                                   | SALK_117415 ( <i>rpn3b-1</i> )_R  | AGACTCCGACACAACGTGATC        | with LBb1   |
|                                   | SALK_088176 ( <i>rpn3b-2</i> )_F  | ACGAAACAAAACAAAATCCCC        |             |
|                                   | SALK_088176 ( <i>rpn3b-2</i> )_R  | TCGGCACAAAAGAAGAGAGAC        | with LBb1   |
|                                   | SALK_134671 ( <i>rpn5b-1</i> )_F  | GGCTCCGGCTGATATACCTAC        |             |
|                                   | SALK_134671 ( <i>rpn5b-1</i> )_R  | ACCGGGTTCTCAAGCTCTTAG        | with LBb1   |
|                                   | SALK_133892 ( <i>rpn5b-2</i> )_F  | AAACCCAGAACAATGGATTCC        |             |
|                                   | SALK_133892 ( <i>rpn5b-2</i> )_R  | GCCTGAAAGATTCTTTCCACC        | with LBb1   |
|                                   | SALK_127791 ( <i>rpn5b-3</i> )_F  | CCCTTCTGTAAAGGAAAACCC        |             |
|                                   | SALK_127791 ( <i>rpn5b-3</i> )_R  | GCCTGAAAGATTCTTTCCACC        | with LBb1   |
|                                   | SALK_151595 ( <i>rpn8a-3</i> )_F  | TTGCTCAGGGATGTGAAAGAC        |             |
|                                   | SALK_151595 ( <i>rpn8a-3</i> )_R  | GGCCTAAGCCTAACGAACCTTG       | with LBb1   |
|                                   | SALK_009871 ( <i>rpn8b</i> )_F    | AGAAGCTTTGCGACTTAAGGC        |             |
|                                   | SALK_009871 ( <i>rpn8b</i> )_R    | TTTATGTTTCGCACAGGGTTTC       | with LBb1   |
|                                   | SALK_043310 ( <i>rpn9b</i> )_F    | TTGGATCTTCCAACTTTCGTG        |             |
|                                   | SALK_043310 ( <i>rpn9b</i> )_R    | TTCGATCTTGTATCGGTTTGG        | with LBb1   |
|                                   | SALK_009616 ( <i>rpn10-2</i> )_F  | GTTGCTAGATCAGGCAATTGC        |             |
|                                   | SALK_009616 ( <i>rpn10-2</i> )_R  | AAAACCTACAGCTCGCATGTGG       | with LBb1   |
|                                   | SALK_046321 ( <i>rpn5a-4</i> )_F  | TCCAACATAGTCTCTGCAC          |             |
|                                   | SALK_046321 ( <i>rpn5a-4</i> )_R  | TGATCTTGACTCGCAACGGA         | with LBb1.3 |
|                                   | SALK_049790 ( <i>cap-h2-2</i> )_F | GGTTGCAAATTCAAATGTTCCG       |             |
| SALK_049790 ( <i>cap-h2-2</i> )_R | TTCCAATGAGGTCACAAAAGG             | with LBb1.3                  |             |
| <i>brm-3</i> _F                   | ACCTTCCTTGTCCGATTCTCC             |                              |             |
| <i>brm-3</i> _R                   | GAAACTGTCCATGATGTACC              | with LBa1                    |             |
| Complementation                   | <i>RPN8a/HEB3</i> genomic_F       | CACCTTTCTAAGCCTCGCCGAGAC     |             |
|                                   | <i>RPN8a/HEB3</i> genomic_R       | GCTGGTGGCAGGTATGGCCACAGGCTTT |             |
|                                   | <i>RPT5a/HEB6</i> genomic_F       | CACCCTCTAGAGGTTCCCAATTAG     |             |
|                                   | <i>RPT5a/HEB6</i> genomic_R       | GGCGTAGTAGTTCAAGCTTG         |             |
| Overexpression                    | <i>BRM3</i> CDS_F                 | CACCATGCAATCTGGAGGCAGTGG     |             |
|                                   | <i>BRM3</i> CDS_R                 | TAAATGGCTAGGCCGTCTTTTACC     |             |
| RT-PCR                            | <i>BRCA1</i> (At4g21070)_F        | CCATGTATTTTGCAATGCGTG        |             |
|                                   | <i>BRCA1</i> (At4g21070)_R        | TGTGGAGCACCTCGAATCTCT        |             |
|                                   | <i>RAD51</i> (At5g20850)_F        | CGAGGAAGGATCTCTTGACAG        |             |
|                                   | <i>RAD51</i> (At5g20850)_R        | GCACTAGTGAACCCAGAGG          |             |
|                                   | <i>GR1</i> (At3g52115)_F          | GAAGGAGCAGACAAAGTGAG         |             |
|                                   | <i>GR1</i> (At3g52115)_R          | GGTGAGATGGAAGTGATAGG         |             |
|                                   | <i>PARP1</i> (At4g02390)_F        | GCTTTGGGAGACATGAATGAAC       |             |
|                                   | <i>PARP1</i> (At4g02390)_R        | AAGTGGAAACAACAACCCGTCT       |             |
|                                   | <i>Actin8</i> (At1g49240)_F       | GCCAGATCTTCATCGTCGTG         |             |
| <i>Actin8</i> (At1g49240)_R       | TCTCCAGCGAATCCAACCTT              |                              |             |

**Supplementary Table 4.** Primers for mapping of *heb* mutations

| Loci        | Marker name | Type | Primer Sequence (5' to 3')                         | Product size |     |
|-------------|-------------|------|----------------------------------------------------|--------------|-----|
|             |             |      |                                                    | Col-0        | Ler |
| <i>heb3</i> | T32M21      | SSLP | GAGAACCAGATGATCCAAGTCC<br>ATCCACCAATGCTACGTTCC     | 193          | 183 |
|             | NHFD        | SSLP | AAAAACCCAAACTTTCTATTTATAC<br>ACTTCGCTTCAAGTAAAGAGG | 124          | 113 |
|             | F8L15       | SSLP | AAAAATCAGCATTGTTGTGGTT<br>GCTTGACTCCGGTGTGACT      | 240          | 196 |
|             | K18I23      | SSLP | TTGCTACAACCTTGCATTCC<br>TTAAAGTTTTCCGGTGTACG       | 213          | 223 |
|             | MOP10       | SSLP | CTTGCACTACATGTCCATAGAACC<br>ATCGTGAGCCTTATCAACTTGC | 248          | 259 |
|             | MJJ3a       | SSLP | TGCCAAAAGACAGAAAACGAA<br>ATTGATTTGCAAAATGAGTATCC   | 145          | 112 |
|             | MJJ3b       | SSLP | GGATCCAGGGTCTGACTCAA<br>GAACCAGCAGCAAGTGAACA       | 177          | 168 |
|             | MJJ3c       | SSLP | CCTCTCCCTTGGTTCTTTCTTC<br>CTGACTTCAGCTTTGGGTAAGG   | 222          | 234 |
| <i>heb6</i> | nga172      | SSLP | CATCCGAATGCCATTGTTC<br>AGCTGCTTCCTTATAGCGTCC       | 162          | 136 |
|             | T12H1       | SSLP | AGGTTAGCGATTGAAGTTTCG<br>AAAAGCAGTGTTGGGGAAGA      | 246          | 233 |
|             | F22F7a      | SSLP | TTGTCACCACATTAATTCCAAG<br>GAACCCCTGAACTCTGCAAC     | 242          | 177 |
|             | F22F7b      | SSLP | CAATGCCAGCTGCAAAGTTA<br>CGCCGTTAGTTTACCCAAAA       | 220          | 203 |
|             | F18C1a      | SSLP | ACTGCTGCTCCTAACCAAGTCTC<br>GCAGTTGAACAATACCCTCCTC  | 210          | 200 |
|             | F18C1b      | SSLP | CCGGTGGAGAAAAGAACAAA<br>GGAAATCCGGCTAGTGAGAA       | 165          | 161 |
|             | F18C1c      | SSLP | TTTGTGCTGGGTTTCAATCA<br>TGTGTGATGGAATCAATTTGG      | 157          | 149 |
