# Supplementary material for: Proteasomal degradation of BRAHMA promotes Boron tolerance in Arabidopsis
Source: PubMed Central journal article supplement (PMC6290004; doi:10.1038/s41467-018-07393-6), 2018-12-11
Supplement: 41467_2018_7393_MOESM3_ESM.pdf [file 41467_2018_7393_MOESM3_ESM.pdf]

**Description of Additional Supplementary Files:**

File Name: Supplementary Data 1

Description: The list of poly-Ub proteins identified in the roots of wild type and *rpt5a-4* under normal and high-B conditions.
